# Supplementary material for: Lack of acquired resistance in HER2-positive breast cancer cells after long-term HER2 siRNA nanoparticle treatment
Source: PLoS One. 2018 Jun 7;13(6):e0198141. doi: 10.1371/journal.pone.0198141 (PMC5991725; doi:10.1371/journal.pone.0198141)
Supplement: S1 Dataset — (XLSX) [file pone.0198141.s001.xlsx]

## Sheet: RawLog2
	Antibody Name	14-3-3-beta	14-3-3-zeta	4E-BP1	4E-BP1_pS65	53BP1	A-Raf	ACC1	ACC_pS79	ADAR1	Akt	Akt_pS473	Akt_pT308	AMPK-a2_pS345	AMPKa	AMPKa_pT172	Annexin-I	Annexin-VII	AR	ARID1A	Atg3	Atg7	ATM	ATM_pS1981	ATR_pS428	Aurora-B	Axl	b-Actin	b-Catenin	b-Catenin_pT41_S45	B-Raf	B-Raf_pS445	B7-H4	Bad_pS112	Bak	BAP1	Bax	Bcl-xL	Bcl2	Beclin	Bid	Bim	BiP-GRP78	BRD4	c-Abl	c-IAP2	c-Jun_pS73	c-Kit	c-Met_pY1234_Y1235
	Antibody Origin	R	R	R	R	R	R	R	R	M	R	R	R	R	R	R	M	M	R	R	R	R	R	R	R	R	R	R	R	R	R	R	R	R	R	M	R	R	M	G	R	R	M	R	R	R	R	R	R
	Gene Name	YWHAB	YWHAZ	EIF4EBP1	EIF4EBP1	TP53BP1	ARAF	ACACA	ACACA	ADAR	AKT1	AKT1	AKT1	PRKAA2	PRKAA1	PRKAA1	ANXA1	ANXA7	AR	ARID1A	ATG3	ATG7	ATM	ATM	ATR	AIM1	AXL	ACTB	CTNNB1	CTNNB1	BRAF	BRAF	VTCN1	BAD	BAK1	BAP1	BAX	BCL2L1	BCL2	BECN1	BID	BCL2L11	HSPA5	BRD4	ABL1	BIRC3	JUN	KIT	MET
	Validation Status	V	V	V	V	V	V	C	V	V	V	V	V	V	C	C	V	V	V	C	V	V	V	V	C	V	V	C	V	V	C	V	C	V	C	V	V	V	V	C	C	V	C	V	V	C	V	V	V
	Slide Id	GBL1104023	GBL1104024	GBL1103783	GBL1103784	GBL1103871	GBL1103933	GBL1103786	GBL1103785	GBL1104049	GBL1103778	GBL1103775	GBL1104121	GBL1103953	GBL1103787	GBL1103788	GBL1104052	GBL1104048	GBL1104098	GBL1103966	GBL1103973	GBL1103974	GBL1103955	GBL1103956	GBL1103997	GBL1103963	GBL1103945	GBL1103916	GBL1103792	GBL1103917	GBL1104125	GBL1103796	GBL1103992	GBL1103789	GBL1103790	GBL1104074	GBL1103791	GBL1103793	GBL1104131	GBL1104087	GBL1103794	GBL1103795	GBL1104126	GBL1103969	GBL1103968	GBL1103975	GBL1103802	GBL1103803	GBL1104093
	Antibody Name in Heatmap	14-3-3-beta-R-V	14-3-3-zeta-R-V	4E-BP1-R-V	4E-BP1_pS65-R-V	53BP1-R-V	A-Raf-R-V	ACC1-R-C	ACC_pS79-R-V	ADAR1-M-V	Akt-R-V	Akt_pS473-R-V	Akt_pT308-R-V	AMPK-a2_pS345-R-V	AMPKa-R-C	AMPKa_pT172-R-C	Annexin-I-M-V	Annexin-VII-M-V	AR-R-V	ARID1A-R-C	Atg3-R-V	Atg7-R-V	ATM-R-V	ATM_pS1981-R-V	ATR_pS428-R-C	Aurora-B-R-V	Axl-R-V	b-Actin-R-C	b-Catenin-R-V	b-Catenin_pT41_S45-R-V	B-Raf-R-C	B-Raf_pS445-R-V	B7-H4-R-C	Bad_pS112-R-V	Bak-R-C	BAP1-M-V	Bax-R-V	Bcl-xL-R-V	Bcl2-M-V	Beclin-G-C	Bid-R-C	Bim-R-V	BiP-GRP78-M-C	BRD4-R-V	c-Abl-R-V	c-IAP2-R-C	c-Jun_pS73-R-V	c-Kit-R-V	c-Met_pY1234_Y1235-R-V
	Probabilities (QC Score)	0.95038	0.960315	0.963321	0.967658	0.974449	0.95962	0.96617	0.953881	0.953315	0.945115	0.96718	0.941804	0.923499	0.964362	0.974401	0.930091	0.839121	0.929832	0.952876	0.893691	0.969682	0.963859	0.890778	0.945009	0.943998	0.964858	0.822914	0.950618	0.9068	0.929841	0.952239	0.911671	0.960604	0.95764	0.917675	0.950547	0.967553	0.855205	0.918156	0.939759	0.96108	0.870323	0.936145	0.963543	0.933187	0.94487	0.962975	0.918246
	Slide no.	1	2	3	4	5	6	7	8	9	10	11	12	13	14	15	16	17	18	19	20	21	22	23	24	25	26	27	28	29	30	31	32	33	34	35	36	37	38	39	40	41	42	43	44	45	46	47	48
Sample description	Sample Type	14-3-3-beta-R-V	14-3-3-zeta-R-V	4E-BP1-R-V	4E-BP1_pS65-R-V	53BP1-R-V	A-Raf-R-V	ACC1-R-C	ACC_pS79-R-V	ADAR1-M-V	Akt-R-V	Akt_pS473-R-V	Akt_pT308-R-V	AMPK-a2_pS345-R-V	AMPKa-R-C	AMPKa_pT172-R-C	Annexin-I-M-V	Annexin-VII-M-V	AR-R-V	ARID1A-R-C	Atg3-R-V	Atg7-R-V	ATM-R-V	ATM_pS1981-R-V	ATR_pS428-R-C	Aurora-B-R-V	Axl-R-V	b-Actin-R-C	b-Catenin-R-V	b-Catenin_pT41_S45-R-V	B-Raf-R-C	B-Raf_pS445-R-V	B7-H4-R-C	Bad_pS112-R-V	Bak-R-C	BAP1-M-V	Bax-R-V	Bcl-xL-R-V	Bcl2-M-V	Beclin-G-C	Bid-R-C	Bim-R-V	BiP-GRP78-M-C	BRD4-R-V	c-Abl-R-V	c-IAP2-R-C	c-Jun_pS73-R-V	c-Kit-R-V	c-Met_pY1234_Y1235-R-V
		RawLog2	RawLog2	RawLog2	RawLog2	RawLog2	RawLog2	RawLog2	RawLog2	RawLog2	RawLog2	RawLog2	RawLog2	RawLog2	RawLog2	RawLog2	RawLog2	RawLog2	RawLog2	RawLog2	RawLog2	RawLog2	RawLog2	RawLog2	RawLog2	RawLog2	RawLog2	RawLog2	RawLog2	RawLog2	RawLog2	RawLog2	RawLog2	RawLog2	RawLog2	RawLog2	RawLog2	RawLog2	RawLog2	RawLog2	RawLog2	RawLog2	RawLog2	RawLog2	RawLog2	RawLog2	RawLog2	RawLog2	RawLog2
BT474_1	human cell line	0.392534	0.251527	-0.0587346	1.05172	0.834255	1.07996	2.84252	0.946341	1.9648	3.18225	2.21101	1.54171	-0.586702	0.0390293	0.541085	-1.46713	-1.92446	0.491123	1.76008	-0.538039	-0.388834	0.502693	-1.29397	-0.839757	-1.07944	-4.69902	-0.901667	1.30622	-0.293633	0.787529	1.05489	-3.29067	0.398875	-0.210994	-0.269665	-0.420773	0.706622	-2.26672	0.0291796	-0.3117	0.411977	-1.69804	2.45464	0.984635	-1.65529	-0.58753	0.12562	-0.628964
BT474_2	human cell line	0.386161	0.21152	-0.0397463	1.04361	0.843553	1.14373	2.90532	1.10212	1.92279	3.34119	2.50276	1.64151	-0.803711	0.0759651	0.631764	-1.60705	-2.0743	0.44668	2.01365	-0.578128	-0.390669	0.566965	-1.39397	-0.860483	-1.01146	-4.69223	-0.794775	1.59005	-0.333623	0.848805	1.20382	-3.40733	0.391522	-0.244211	-0.273261	-0.429058	0.834164	-2.05226	-0.0564632	-0.33258	0.272635	-1.7959	2.64678	1.0848	-1.81525	-0.638367	-0.120677	-0.789498
BT474_3	human cell line	0.336411	0.191868	0.00982761	1.04898	0.911629	1.08359	2.86614	1.11712	1.9893	3.12349	2.08487	1.5012	-0.846938	0.092051	0.724811	-1.47096	-2.03673	0.424962	2.12944	-0.559957	-0.373509	0.524619	-1.37033	-0.861885	-1.05733	-4.70784	-0.741275	1.31074	-0.288796	0.83329	1.09475	-3.45419	0.387581	-0.196151	-0.304496	-0.416371	0.60033	-2.04223	-0.0386731	-0.282476	0.359732	-1.72476	2.69104	1.05067	-1.72038	-0.554456	-0.120313	-0.77965
BT474-TR_1	human cell line	0.279597	-0.0795956	-0.167853	0.626705	0.582765	0.9576	2.21364	1.00331	1.75154	2.84937	1.77091	1.18696	-0.836907	-0.107513	0.00784358	-2.21442	-2.11375	-0.0209774	1.37579	-0.694379	-0.670096	0.299052	-1.45234	-1.00358	-1.2509	-4.72512	-1.06314	0.919011	-0.455586	0.611582	0.955471	-3.45944	0.0684531	-0.318229	-0.464559	-0.523181	0.376817	-2.29567	-0.168199	-0.524766	0.222008	-1.79521	2.3714	0.747849	-1.8279	-0.704448	-0.106087	-0.8709
BT474-TR_2	human cell line	0.396322	0.0870529	0.0114909	0.707412	0.7735	1.11669	2.39709	1.23948	1.91081	3.09841	1.95447	1.36282	-0.880352	0.0422115	0.178416	-2.15554	-1.98354	0.0806225	1.64567	-0.58261	-0.53871	0.530159	-1.30775	-0.892143	-1.03102	-4.66058	-0.837235	1.18376	-0.353691	0.813549	1.24059	-3.35432	0.193419	-0.188509	-0.294498	-0.415287	0.592002	-1.40587	-0.0645235	-0.354081	0.319737	-1.71171	2.22604	0.922227	-1.77064	-0.637267	-0.200538	-0.829386
BT474-TR_3	human cell line	0.401205	0.0353858	0.00730056	0.847564	0.705909	1.08746	2.37542	1.10282	1.93147	2.88232	1.87007	1.42233	-0.709325	-0.0171746	0.153682	-2.03676	-2.03912	0.189418	1.59564	-0.613083	-0.585118	0.442667	-1.3751	-0.926046	-1.17508	-4.93711	-0.992108	0.989007	-0.365713	0.787535	1.10312	-3.48049	0.169299	-0.192124	-0.346317	-0.484411	0.433784	-1.96532	-0.0284816	-0.425562	0.398273	-1.76662	2.56283	0.919615	-1.69291	-0.670784	0.0529748	-0.703371
BT474-LR_1	human cell line	0.654067	0.452335	0.361772	1.36047	1.03813	1.18446	2.68751	1.30383	2.15469	3.12057	2.45565	2.04008	-0.37522	0.634255	0.584	-1.7285	-1.65098	0.263202	1.62737	-0.380469	-0.0608339	0.294077	-1.13847	-0.787878	-1.07125	-4.6178	-1.02092	1.5218	-0.0740696	1.07171	1.49943	-2.90942	0.567147	0.0100596	-0.0423692	-0.15788	0.735866	-2.30477	0.297163	-0.0671891	0.486977	-1.34882	2.9802	1.29337	-1.40977	-0.564678	0.300845	-0.455916
BT474-LR_2	human cell line	0.477053	0.329685	0.233235	1.21029	0.76326	1.03195	2.55693	1.06615	1.96132	2.89931	2.25989	1.82862	-0.413482	0.491797	0.380764	-1.70291	-1.80015	0.0497175	1.38625	-0.446228	-0.159105	0.164332	-1.13388	-0.828417	-1.16685	-4.65783	-1.05056	1.27012	-0.161902	0.904093	1.35433	-2.97052	0.422293	-0.113906	-0.185965	-0.254255	0.594404	-2.36056	0.0727466	-0.148555	0.32613	-1.44274	2.75034	1.13328	-1.47223	-0.585622	0.249888	-0.43582
BT474-LR_3	human cell line	0.551412	0.374478	0.312037	1.31781	0.997321	1.17977	2.66883	1.25002	2.05427	2.96204	2.29969	1.89458	-0.470609	0.564826	0.464402	-1.79155	-1.80194	0.132452	1.88718	-0.463157	-0.131327	0.203818	-1.22776	-0.842408	-1.20531	-4.64275	-1.0994	1.40137	-0.148999	1.03195	1.43076	-2.9934	0.500989	-0.0250614	-0.111162	-0.25683	0.561255	-2.41085	0.18926	-0.115953	0.404688	-1.49685	2.93445	1.26187	-1.51257	-0.545804	0.281797	-0.517832
BT474-TNPC30_1	human cell line	0.397906	0.262107	-0.0527262	0.903656	0.640511	0.946509	2.78957	1.64874	1.82602	2.8479	1.5125	1.22484	-0.621877	0.146356	0.418625	-2.0873	-1.86484	0.170465	1.59238	-0.483142	-0.313649	0.482051	-1.33853	-0.900338	-1.11348	-4.6629	-0.862701	0.972306	-0.319416	0.76986	1.09489	-3.26553	0.363848	-0.213465	-0.328389	-0.455816	0.260305	-2.3628	0.0364376	-0.466815	0.274145	-1.61235	2.41141	0.893183	-1.71249	-0.683603	0.0219269	-0.686445
BT474-TNPC30_2	human cell line	0.437723	0.287443	0.100938	1.00979	0.820887	1.03921	2.81454	1.72219	1.88009	2.96595	1.66179	1.35158	-0.538794	0.311746	0.484983	-2.00923	-1.82762	0.27174	1.90353	-0.400144	-0.202056	0.632459	-1.21004	-0.81881	-1.02203	-4.63485	-0.740503	1.15266	-0.228541	0.868429	1.23953	-3.18186	0.418864	-0.151378	-0.274683	-0.379366	0.418082	-2.31914	0.139585	-0.341747	0.348403	-1.47014	2.60593	1.03022	-1.52353	-0.580489	0.108738	-0.569728
BT474-TNPC30_3	human cell line	0.446137	0.271201	0.00834073	0.857867	0.727019	1.0542	2.78834	1.75492	1.85993	2.92354	1.65807	1.33122	-0.776494	0.269295	0.473053	-2.20859	-1.88512	0.133582	1.85805	-0.46938	-0.214686	0.56505	-1.28851	-0.84473	-1.05104	-4.67872	-0.767234	1.07593	-0.259184	0.861908	1.21689	-3.24921	0.378948	-0.161376	-0.294593	-0.416703	0.329397	-2.36569	0.0175573	-0.374401	0.247108	-1.60878	2.44782	0.986114	-1.69913	-0.628711	-0.140842	-0.729164
BT474-TNPH30_1	human cell line	0.396281	0.204129	-0.0967154	0.832541	0.572409	1.02727	2.76078	1.57913	1.83906	2.82854	1.4445	1.12644	-0.521026	0.125963	0.613189	-1.78478	-1.8411	0.188228	1.25533	-0.454536	-0.460515	0.354806	-1.21045	-0.869136	-1.0129	-4.6837	-0.701222	1.01092	-0.267551	0.840536	1.25909	-3.24631	0.312418	-0.134088	-0.498124	-0.41174	0.437765	-2.34101	0.0790181	-0.395118	0.370673	-1.49794	2.10348	0.896892	-1.5754	-0.668497	0.0652249	-0.563104
BT474-TNPH30_2	human cell line	0.309158	0.110969	-0.19213	0.719337	0.560183	1.04035	2.67537	1.49353	1.76655	2.71936	1.32431	1.05336	-0.739099	0.048023	0.512667	-2.13763	-1.93611	0.0683589	1.51812	-0.579717	-0.646182	0.295201	-1.39532	-1.01087	-1.16319	-4.73555	-0.819554	0.904215	-0.425766	0.840995	1.22124	-3.3479	0.231328	-0.265207	-0.337441	-0.570623	0.281638	-2.75832	-0.107126	-0.514305	0.271844	-1.67748	2.13276	0.803122	-1.80697	-0.808271	-0.0677182	-0.754223
BT474-TNPH30_3	human cell line	0.176695	0.0100067	-0.37806	0.473998	0.471522	0.979606	2.54554	1.4553	1.68633	2.65752	1.29052	0.976383	-1.07888	-0.00353279	0.40321	-2.31659	-2.07057	-0.0933122	1.32699	-0.685057	-0.679236	0.19573	-1.51274	-1.06603	-1.1706	-4.80181	-0.893167	0.846482	-0.478001	0.758239	1.17683	-3.56843	0.115152	-0.343071	-0.463418	-0.671288	0.24797	-2.49868	-0.255549	-0.633067	0.0860161	-1.88662	1.89491	0.778929	-1.9197	-0.899148	-0.373458	-0.933222
[truncated: 252 more columns]

## Sheet: NormLinear
		Antibody Name	14-3-3-beta	14-3-3-zeta	4E-BP1	4E-BP1_pS65	53BP1	A-Raf	ACC1	ACC_pS79	ADAR1	Akt	Akt_pS473	Akt_pT308	AMPK-a2_pS345	AMPKa	AMPKa_pT172	Annexin-I	Annexin-VII	AR	ARID1A	Atg3	Atg7	ATM	ATM_pS1981	ATR_pS428	Aurora-B	Axl	b-Actin	b-Catenin	b-Catenin_pT41_S45	B-Raf	B-Raf_pS445	B7-H4	Bad_pS112	Bak	BAP1	Bax	Bcl-xL	Bcl2	Beclin	Bid	Bim	BiP-GRP78	BRD4	c-Abl	c-IAP2	c-Jun_pS73	c-Kit
		Antibody Origin	R	R	R	R	R	R	R	R	M	R	R	R	R	R	R	M	M	R	R	R	R	R	R	R	R	R	R	R	R	R	R	R	R	R	M	R	R	M	G	R	R	M	R	R	R	R	R
		Gene Name	YWHAB	YWHAZ	EIF4EBP1	EIF4EBP1	TP53BP1	ARAF	ACACA	ACACA	ADAR	AKT1	AKT1	AKT1	PRKAA2	PRKAA1	PRKAA1	ANXA1	ANXA7	AR	ARID1A	ATG3	ATG7	ATM	ATM	ATR	AIM1	AXL	ACTB	CTNNB1	CTNNB1	BRAF	BRAF	VTCN1	BAD	BAK1	BAP1	BAX	BCL2L1	BCL2	BECN1	BID	BCL2L11	HSPA5	BRD4	ABL1	BIRC3	JUN	KIT
		Validation Status	V	V	V	V	V	V	C	V	V	V	V	V	V	C	C	V	V	V	C	V	V	V	V	C	V	V	C	V	V	C	V	C	V	C	V	V	V	V	C	C	V	C	V	V	C	V	V
		Slide Id	GBL1104023	GBL1104024	GBL1103783	GBL1103784	GBL1103871	GBL1103933	GBL1103786	GBL1103785	GBL1104049	GBL1103778	GBL1103775	GBL1104121	GBL1103953	GBL1103787	GBL1103788	GBL1104052	GBL1104048	GBL1104098	GBL1103966	GBL1103973	GBL1103974	GBL1103955	GBL1103956	GBL1103997	GBL1103963	GBL1103945	GBL1103916	GBL1103792	GBL1103917	GBL1104125	GBL1103796	GBL1103992	GBL1103789	GBL1103790	GBL1104074	GBL1103791	GBL1103793	GBL1104131	GBL1104087	GBL1103794	GBL1103795	GBL1104126	GBL1103969	GBL1103968	GBL1103975	GBL1103802	GBL1103803
		Antibody Name in Heatmap	14-3-3-beta-R-V	14-3-3-zeta-R-V	4E-BP1-R-V	4E-BP1_pS65-R-V	53BP1-R-V	A-Raf-R-V	ACC1-R-C	ACC_pS79-R-V	ADAR1-M-V	Akt-R-V	Akt_pS473-R-V	Akt_pT308-R-V	AMPK-a2_pS345-R-V	AMPKa-R-C	AMPKa_pT172-R-C	Annexin-I-M-V	Annexin-VII-M-V	AR-R-V	ARID1A-R-C	Atg3-R-V	Atg7-R-V	ATM-R-V	ATM_pS1981-R-V	ATR_pS428-R-C	Aurora-B-R-V	Axl-R-V	b-Actin-R-C	b-Catenin-R-V	b-Catenin_pT41_S45-R-V	B-Raf-R-C	B-Raf_pS445-R-V	B7-H4-R-C	Bad_pS112-R-V	Bak-R-C	BAP1-M-V	Bax-R-V	Bcl-xL-R-V	Bcl2-M-V	Beclin-G-C	Bid-R-C	Bim-R-V	BiP-GRP78-M-C	BRD4-R-V	c-Abl-R-V	c-IAP2-R-C	c-Jun_pS73-R-V	c-Kit-R-V
		Probabilities (QC Score)	0.95038	0.960315	0.963321	0.967658	0.974449	0.95962	0.96617	0.953881	0.953315	0.945115	0.96718	0.941804	0.923499	0.964362	0.974401	0.930091	0.839121	0.929832	0.952876	0.893691	0.969682	0.963859	0.890778	0.945009	0.943998	0.964858	0.822914	0.950618	0.9068	0.929841	0.952239	0.911671	0.960604	0.95764	0.917675	0.950547	0.967553	0.855205	0.918156	0.939759	0.96108	0.870323	0.936145	0.963543	0.933187	0.94487	0.962975
		Slide no.	1	2	3	4	5	6	7	8	9	10	11	12	13	14	15	16	17	18	19	20	21	22	23	24	25	26	27	28	29	30	31	32	33	34	35	36	37	38	39	40	41	42	43	44	45	46	47
CF1&2 Outliers	Sample description	Sample Type	14-3-3-beta-R-V	14-3-3-zeta-R-V	4E-BP1-R-V	4E-BP1_pS65-R-V	53BP1-R-V	A-Raf-R-V	ACC1-R-C	ACC_pS79-R-V	ADAR1-M-V	Akt-R-V	Akt_pS473-R-V	Akt_pT308-R-V	AMPK-a2_pS345-R-V	AMPKa-R-C	AMPKa_pT172-R-C	Annexin-I-M-V	Annexin-VII-M-V	AR-R-V	ARID1A-R-C	Atg3-R-V	Atg7-R-V	ATM-R-V	ATM_pS1981-R-V	ATR_pS428-R-C	Aurora-B-R-V	Axl-R-V	b-Actin-R-C	b-Catenin-R-V	b-Catenin_pT41_S45-R-V	B-Raf-R-C	B-Raf_pS445-R-V	B7-H4-R-C	Bad_pS112-R-V	Bak-R-C	BAP1-M-V	Bax-R-V	Bcl-xL-R-V	Bcl2-M-V	Beclin-G-C	Bid-R-C	Bim-R-V	BiP-GRP78-M-C	BRD4-R-V	c-Abl-R-V	c-IAP2-R-C	c-Jun_pS73-R-V	c-Kit-R-V
			NormLinear	NormLinear	NormLinear	NormLinear	NormLinear	NormLinear	NormLinear	NormLinear	NormLinear	NormLinear	NormLinear	NormLinear	NormLinear	NormLinear	NormLinear	NormLinear	NormLinear	NormLinear	NormLinear	NormLinear	NormLinear	NormLinear	NormLinear	NormLinear	NormLinear	NormLinear	NormLinear	NormLinear	NormLinear	NormLinear	NormLinear	NormLinear	NormLinear	NormLinear	NormLinear	NormLinear	NormLinear	NormLinear	NormLinear	NormLinear	NormLinear	NormLinear	NormLinear	NormLinear	NormLinear	NormLinear	NormLinear
nominal	BT474_1	human cell line	0.986417	1.01682	0.944761	1.0959	1.0389	1.00683	1.10119	0.801278	1.02672	1.18326	1.25266	1.11957	1.07675	0.953322	1.03677	1.44009	0.98901	1.23517	1.0843	0.98901	0.98901	1.03103	0.998505	1.0043	0.98901	0.978564	0.962655	1.10009	0.98901	0.953332	0.883959	0.98901	1.00277	0.976159	1.00625	0.986224	1.19161	1.02561	0.99701	1.01849	1.04965	0.975015	0.98901	0.98901	1.01952	1.0237	1.06271
nominal	BT474_2	human cell line	0.992982	1	0.967916	1.10187	1.05723	1.06402	1.16297	0.902559	1.00834	1.33575	1.55045	1.2131	0.936671	0.988912	1.11629	1.32151	0.901346	1.21101	1.30702	0.972595	0.998729	1.08998	0.941985	1.00097	1.04825	0.994108	1.04821	1.35415	0.972661	1.00575	0.99098	0.922318	1.00875	0.96454	1.0149	0.991473	1.31622	1.20321	0.949987	1.01501	0.963599	0.921193	1.14245	1.07189	0.922665	0.999238	0.905882
nominal	BT474_3	human cell line	0.959323	0.986471	1.00175	1.10598	1.10832	1.02058	1.13181	0.911991	1.05591	1.14866	1.16054	1.10067	0.909022	1	1.19066	1.45223	0.92513	1.19292	1.41624	0.984923	1.01068	1.05845	0.957549	1	1.01544	0.983406	1.08781	1.1158	1.00336	0.99499	0.918824	0.892845	1.006	0.997212	0.993159	1.00023	1.11928	1.2116	0.961774	1.05089	1.02356	0.967755	1.17805	1.04683	0.985377	1.05908	0.906111
nominal	BT474-TR_1	human cell line	1.02989	0.912628	0.989013	0.921633	0.985358	1.04436	0.804044	0.941154	0.999961	1.06071	1.0425	0.98853	1.02217	0.97242	0.808885	0.968635	0.979367	0.977909	0.937978	1.002	0.918883	1.01087	1.01019	1.01222	0.99155	1.08508	0.971827	0.949715	0.998104	0.952811	0.931606	0.993401	0.900451	1.02322	0.992575	1.03723	1.07049	1.13499	0.981771	0.992081	1.03893	1.02917	1.05407	0.947651	1.02133	1.06587	1.02186
nominal	BT474-TR_2	human cell line	1.01527	0.931353	1.01823	0.88615	1.0225	1.06021	0.830151	1.00788	1.01527	1.1461	1.07644	1.01527	0.901775	0.980798	0.827728	0.917362	0.974536	0.953976	1.02823	0.984386	0.915093	1.07875	1.01527	0.9942	1.04992	1.03167	1.03335	1.0374	0.973875	0.996458	1.03209	0.971451	0.892755	1.01782	1.01534	1.01627	1.12983	1.91207	0.959122	1.01527	1.01078	0.991468	0.866492	0.97229	0.966178	1.01527	0.870189
nominal	BT474-TR_3	human cell line	1.03619	0.914003	1.03269	0.993308	0.992442	1.05677	0.831806	0.932516	1.04758	1.0036	1.03269	1.07617	1.03269	0.95739	0.827616	1.01317	0.953791	1.04634	1.01022	0.980345	0.901326	1.03269	0.985588	0.987768	0.966451	0.866335	0.944091	0.921945	0.982361	0.995439	0.954374	0.905374	0.893014	1.03269	0.99632	0.985342	1.02984	1.31972	1.00025	0.982768	1.08564	0.970812	1.11311	0.98718	1.03715	1.00897	1.05515
nominal	BT474-LR_1	human cell line	1.02592	1.01396	1.09707	1.17772	1.03818	0.939157	0.858077	0.890684	1.01611	0.98364	1.28766	1.37216	1.08169	1.24953	0.926669	1.0424	1.03717	0.915047	0.858077	0.957105	1.07712	0.774099	0.964906	0.903243	0.862961	0.898179	0.768948	1.10828	0.999129	1.0072	1.04371	1.11762	0.977642	0.987165	1.02201	1.02669	1.05503	0.866668	1.04159	1.04686	0.959282	1.07761	1.23519	1.06284	1.04865	0.902356	1.04109
nominal	BT474-LR_2	human cell line	0.974793	1.00042	1.07801	1.14002	0.921742	0.907639	0.841979	0.811443	0.954582	0.90639	1.20769	1.273	1.13153	1.21603	0.864625	1.13978	1.00468	0.847737	0.779874	0.982307	1.08085	0.760016	1.0398	0.943375	0.867556	0.938419	0.809206	0.999925	1.00987	0.963257	1.01387	1.15076	0.949855	0.973096	0.993825	1.0316	1.02745	0.895658	0.957686	1.06287	0.921742	1.08461	1.13142	1.02178	1.07873	0.955337	1.07953
nominal	BT474-LR_3	human cell line	0.999818	1.00529	1.1091	1.19648	1.05607	0.979568	0.886363	0.897912	0.991787	0.922195	1.20937	1.2981	1.05948	1.2461	0.892545	1.04415	0.977494	0.874563	1.07508	0.945749	1.07337	0.76091	0.949101	0.910117	0.822891	0.923764	0.762043	1.06685	0.992597	1.02531	1.04139	1.10337	0.977174	1.00815	1.01965	1.00314	0.978156	0.842615	1.0114	1.05905	0.948162	1.01767	1.25219	1.08815	1.02186	0.956681	1.07513
nominal	BT474-TNPC30_1	human cell line	1.01944	1.05466	0.976819	1.01832	0.935262	0.945076	1.09297	1.34249	0.960192	0.966304	0.794772	0.925439	1.08195	1.05738	0.980618	0.964683	1.06128	1.01832	0.993912	1.05782	1.0728	1.0465	0.996822	0.991536	0.994577	1.03311	1.01832	0.898654	1.00028	0.969636	0.935743	1.03622	1.00772	1.00337	0.994742	0.991083	0.900458	0.987969	1.03173	0.941776	0.98228	1.06534	0.988253	0.955772	1.00893	0.986133	1.01832
nominal	BT474-TNPC30_2	human cell line	0.983666	1.00749	1.01993	1.02881	0.994792	0.945962	1.04382	1.32593	0.935701	0.984349	0.827343	0.948419	1.07577	1.11306	0.963776	0.955839	1.0222	1.02535	1.15749	1.05171	1.08795	1.09023	1.02282	0.984808	0.99464	0.988761	1.04033	0.955839	0.999952	0.974499	0.970955	1.03071	0.982654	0.98322	0.969122	0.980899	0.942887	0.955839	1.0402	0.964045	0.970711	1.10357	1.06152	0.986525	1.07956	0.994206	1.01512
nominal	BT474-TNPC30_3	human cell line	1.03028	1.03735	0.99603	0.964218	0.970621	0.995312	1.06736	1.41237	0.96082	0.995312	0.859292	0.973749	0.950035	1.12542	0.995312	0.866859	1.02282	0.970189	1.16788	1.04382	1.12301	1.08343	1.00867	1.00722	1.0151	0.998756	1.0634	0.943759	1.01936	1.01017	0.995312	1.02433	0.995312	1.01675	0.995312	0.995312	0.923288	0.963712	0.995312	0.981391	0.942261	1.04385	0.990616	0.996333	0.995312	1.00123	0.889121
nominal	BT474-TNPH30_1	human cell line	0.992487	0.987443	0.923475	0.944777	0.869532	0.974161	1.04422	1.24683	0.944361	0.929263	0.738967	0.842521	1.13089	1.01612	1.09376	1.15959	1.05155	1.00481	0.766903	1.05166	0.944406	0.933874	1.06176	0.987539	1.03936	0.992515	1.11006	0.899642	1.01062	0.992515	1.02198	1.0235	0.947784	1.03326	0.861922	0.995935	0.992515	0.977588	1.03571	0.96468	1.02364	1.12404	0.778081	0.93395	1.08139	0.971261	1.02275
nominal	BT474-TNPH30_2	human cell line	1.01002	1.00069	0.9344	0.944239	0.932042	1.06267	1.06393	1.2702	0.970822	0.931326	0.734979	0.865785	1.051	1.04067	1.10279	0.981556	1.06429	0.99961	0.994672	1.04237	0.897631	0.96867	1.00973	0.967652	1.01241	1.03505	1.10549	0.903188	0.97902	1.07326	1.07616	1.03119	0.968566	1.01992	1.04152	0.964346	0.962872	0.791336	0.984089	0.960142	1.0333	1.07292	0.858365	0.946077	0.995643	0.952994	1.00828
nominal	BT474-TNPH30_3	human cell line	0.987525	1	0.880354	0.853733	0.939378	1.09196	1.04214	1.32574	0.984208	0.95627	0.769486	0.879697	0.89005	1.07619	1.09556	0.929263	1.03915	0.957762	0.933766	1.0385	0.940248	0.969006	0.997598	0.99818	1.0795	1.05952	1.12588	0.930023	1.01196	1.08615	1.11841	0.948523	0.957748	1.03567	1.02292	0.963883	1.00816	1.01535	0.951588	0.947717	0.9736	0.994727	0.780127	0.997099	0.986882	0.959021	0.874258
[truncated: 255 more columns]

## Sheet: NormLog2
	Antibody Name	14-3-3-beta	14-3-3-zeta	4E-BP1	4E-BP1_pS65	53BP1	A-Raf	ACC1	ACC_pS79	ADAR1	Akt	Akt_pS473	Akt_pT308	AMPK-a2_pS345	AMPKa	AMPKa_pT172	Annexin-I	Annexin-VII	AR	ARID1A	Atg3	Atg7	ATM	ATM_pS1981	ATR_pS428	Aurora-B	Axl	b-Actin	b-Catenin	b-Catenin_pT41_S45	B-Raf	B-Raf_pS445	B7-H4	Bad_pS112	Bak	BAP1	Bax	Bcl-xL	Bcl2	Beclin	Bid	Bim	BiP-GRP78	BRD4	c-Abl	c-IAP2	c-Jun_pS73	c-Kit	c-Met_pY1234_Y1235
	Antibody Origin	R	R	R	R	R	R	R	R	M	R	R	R	R	R	R	M	M	R	R	R	R	R	R	R	R	R	R	R	R	R	R	R	R	R	M	R	R	M	G	R	R	M	R	R	R	R	R	R
	Gene Name	YWHAB	YWHAZ	EIF4EBP1	EIF4EBP1	TP53BP1	ARAF	ACACA	ACACA	ADAR	AKT1	AKT1	AKT1	PRKAA2	PRKAA1	PRKAA1	ANXA1	ANXA7	AR	ARID1A	ATG3	ATG7	ATM	ATM	ATR	AIM1	AXL	ACTB	CTNNB1	CTNNB1	BRAF	BRAF	VTCN1	BAD	BAK1	BAP1	BAX	BCL2L1	BCL2	BECN1	BID	BCL2L11	HSPA5	BRD4	ABL1	BIRC3	JUN	KIT	MET
	Validation Status	V	V	V	V	V	V	C	V	V	V	V	V	V	C	C	V	V	V	C	V	V	V	V	C	V	V	C	V	V	C	V	C	V	C	V	V	V	V	C	C	V	C	V	V	C	V	V	V
	Slide Id	GBL1104023	GBL1104024	GBL1103783	GBL1103784	GBL1103871	GBL1103933	GBL1103786	GBL1103785	GBL1104049	GBL1103778	GBL1103775	GBL1104121	GBL1103953	GBL1103787	GBL1103788	GBL1104052	GBL1104048	GBL1104098	GBL1103966	GBL1103973	GBL1103974	GBL1103955	GBL1103956	GBL1103997	GBL1103963	GBL1103945	GBL1103916	GBL1103792	GBL1103917	GBL1104125	GBL1103796	GBL1103992	GBL1103789	GBL1103790	GBL1104074	GBL1103791	GBL1103793	GBL1104131	GBL1104087	GBL1103794	GBL1103795	GBL1104126	GBL1103969	GBL1103968	GBL1103975	GBL1103802	GBL1103803	GBL1104093
	Antibody Name in Heatmap	14-3-3-beta-R-V	14-3-3-zeta-R-V	4E-BP1-R-V	4E-BP1_pS65-R-V	53BP1-R-V	A-Raf-R-V	ACC1-R-C	ACC_pS79-R-V	ADAR1-M-V	Akt-R-V	Akt_pS473-R-V	Akt_pT308-R-V	AMPK-a2_pS345-R-V	AMPKa-R-C	AMPKa_pT172-R-C	Annexin-I-M-V	Annexin-VII-M-V	AR-R-V	ARID1A-R-C	Atg3-R-V	Atg7-R-V	ATM-R-V	ATM_pS1981-R-V	ATR_pS428-R-C	Aurora-B-R-V	Axl-R-V	b-Actin-R-C	b-Catenin-R-V	b-Catenin_pT41_S45-R-V	B-Raf-R-C	B-Raf_pS445-R-V	B7-H4-R-C	Bad_pS112-R-V	Bak-R-C	BAP1-M-V	Bax-R-V	Bcl-xL-R-V	Bcl2-M-V	Beclin-G-C	Bid-R-C	Bim-R-V	BiP-GRP78-M-C	BRD4-R-V	c-Abl-R-V	c-IAP2-R-C	c-Jun_pS73-R-V	c-Kit-R-V	c-Met_pY1234_Y1235-R-V
	Probabilities (QC Score)	0.95038	0.960315	0.963321	0.967658	0.974449	0.95962	0.96617	0.953881	0.953315	0.945115	0.96718	0.941804	0.923499	0.964362	0.974401	0.930091	0.839121	0.929832	0.952876	0.893691	0.969682	0.963859	0.890778	0.945009	0.943998	0.964858	0.822914	0.950618	0.9068	0.929841	0.952239	0.911671	0.960604	0.95764	0.917675	0.950547	0.967553	0.855205	0.918156	0.939759	0.96108	0.870323	0.936145	0.963543	0.933187	0.94487	0.962975	0.918246
	Slide no.	1	2	3	4	5	6	7	8	9	10	11	12	13	14	15	16	17	18	19	20	21	22	23	24	25	26	27	28	29	30	31	32	33	34	35	36	37	38	39	40	41	42	43	44	45	46	47	48
Sample description	Sample Type	14-3-3-beta-R-V	14-3-3-zeta-R-V	4E-BP1-R-V	4E-BP1_pS65-R-V	53BP1-R-V	A-Raf-R-V	ACC1-R-C	ACC_pS79-R-V	ADAR1-M-V	Akt-R-V	Akt_pS473-R-V	Akt_pT308-R-V	AMPK-a2_pS345-R-V	AMPKa-R-C	AMPKa_pT172-R-C	Annexin-I-M-V	Annexin-VII-M-V	AR-R-V	ARID1A-R-C	Atg3-R-V	Atg7-R-V	ATM-R-V	ATM_pS1981-R-V	ATR_pS428-R-C	Aurora-B-R-V	Axl-R-V	b-Actin-R-C	b-Catenin-R-V	b-Catenin_pT41_S45-R-V	B-Raf-R-C	B-Raf_pS445-R-V	B7-H4-R-C	Bad_pS112-R-V	Bak-R-C	BAP1-M-V	Bax-R-V	Bcl-xL-R-V	Bcl2-M-V	Beclin-G-C	Bid-R-C	Bim-R-V	BiP-GRP78-M-C	BRD4-R-V	c-Abl-R-V	c-IAP2-R-C	c-Jun_pS73-R-V	c-Kit-R-V	c-Met_pY1234_Y1235-R-V
		NormLog2	NormLog2	NormLog2	NormLog2	NormLog2	NormLog2	NormLog2	NormLog2	NormLog2	NormLog2	NormLog2	NormLog2	NormLog2	NormLog2	NormLog2	NormLog2	NormLog2	NormLog2	NormLog2	NormLog2	NormLog2	NormLog2	NormLog2	NormLog2	NormLog2	NormLog2	NormLog2	NormLog2	NormLog2	NormLog2	NormLog2	NormLog2	NormLog2	NormLog2	NormLog2	NormLog2	NormLog2	NormLog2	NormLog2	NormLog2	NormLog2	NormLog2	NormLog2	NormLog2	NormLog2	NormLog2	NormLog2	NormLog2
BT474_1	human cell line	-0.0197307	0.0240643	-0.0819779	0.132116	0.055053	0.00982071	0.139067	-0.319626	0.0380474	0.242767	0.324998	0.162949	0.10668	-0.0689644	0.0520892	0.526163	-0.0159427	0.304715	0.116764	-0.0159427	-0.0159427	0.0440831	-0.00215853	0.00618469	-0.0159427	-0.0312612	-0.0549088	0.13762	-0.0159427	-0.0689492	-0.177948	-0.0159427	0.00398356	-0.0348121	0.00898507	-0.0200133	0.252914	0.0364801	-0.00432043	0.0264381	0.0699041	-0.0365037	-0.0159427	-0.0159427	0.0278955	0.0337946	0.0877501	0.0584643
BT474_2	human cell line	-0.0101605	0	-0.0470468	0.139949	0.0802938	0.0895293	0.21781	-0.147907	0.0119814	0.417646	0.632684	0.278694	-0.0943856	-0.0160859	0.158711	0.402188	-0.149847	0.276216	0.386276	-0.0400889	-0.00183481	0.124298	-0.0862235	0.0014021	0.067976	-0.00852534	0.0679255	0.437392	-0.0399904	0.00826975	-0.0130723	-0.116664	0.0125736	-0.0520865	0.0213313	-0.0123551	0.396398	0.266884	-0.0740205	0.0215007	-0.0534952	-0.118424	0.192132	0.100162	-0.11612	-0.00110011	-0.142604	-0.0861269
BT474_3	human cell line	-0.0599114	-0.0196516	0.00252705	0.145325	0.148369	0.0293883	0.17863	-0.132908	0.0784818	0.199946	0.214791	0.138383	-0.137613	0	0.251758	0.538271	-0.112272	0.254498	0.502062	-0.0219176	0.0153244	0.0819521	-0.062582	0	0.0221091	-0.0241415	0.121426	0.158081	0.00483647	-0.0072457	-0.12214	-0.163518	0.00863208	-0.00402718	-0.00990358	0.000332024	0.162565	0.276915	-0.0562304	0.0716051	0.0336019	-0.0472857	0.236396	0.0660312	-0.0212525	0.0828108	-0.14224	-0.0762791
BT474-TR_1	human cell line	0.0424903	-0.1319	-0.0159386	-0.117736	-0.0212795	0.0626172	-0.314653	-0.087498	-5.6249e-05	0.0850364	0.0600538	-0.0166431	0.0316326	-0.0403492	-0.305994	-0.0459744	-0.0300791	-0.0322272	-0.0923747	0.00287558	-0.122048	0.0156005	0.0146287	0.0175183	-0.012242	0.1178	-0.0412281	-0.074434	-0.00273824	-0.0697385	-0.102208	-0.00955209	-0.15128	0.0331102	-0.0107515	0.0527367	0.0982667	0.182684	-0.0265412	-0.0114708	0.0550931	0.0414842	0.0759693	-0.0775716	0.0304453	0.0920334	0.0312008	-0.00831402
BT474-TR_2	human cell line	0.0218667	-0.1026	0.0260571	-0.174378	0.0321069	0.0843551	-0.268555	0.0113254	0.0218667	0.196736	0.106265	0.0218667	-0.14916	-0.0279728	-0.272771	-0.124436	-0.0372121	-0.0679755	0.0401577	-0.0227039	-0.12801	0.109359	0.0218667	-0.00839172	0.0702859	0.0449832	0.0473324	0.052971	-0.0381915	-0.0051197	0.0455672	-0.0417864	-0.163663	0.0254821	0.0219614	0.0232824	0.176104	0.935138	-0.0602141	0.0218667	0.0154737	-0.0123623	-0.206742	-0.0405416	-0.0496393	0.0218667	-0.200599	-0.104148
BT474-TR_3	human cell line	0.0512876	-0.129729	0.0464048	-0.0096871	-0.0109456	0.079665	-0.265681	-0.100799	0.0670647	0.00518359	0.0464048	0.105911	0.0464048	-0.0628207	-0.272966	0.0188783	-0.0682556	0.0653582	0.0146723	-0.0286388	-0.149879	0.0464048	-0.0209429	-0.017756	-0.0492311	-0.207003	-0.0830029	-0.117247	-0.0256754	-0.00659585	-0.0673735	-0.143414	-0.163245	0.0464048	-0.0053193	-0.0213038	0.042424	0.400232	0.000365945	-0.0250767	0.118548	-0.0427362	0.154594	-0.0186148	0.052624	0.0128883	0.0774527	0.0464048
BT474-LR_1	human cell line	0.0369244	0.0199942	0.133651	0.235993	0.0540536	-0.0905623	-0.220821	-0.167015	0.0230552	-0.0237983	0.364752	0.456444	0.113284	0.321383	-0.109873	0.0599129	0.0526518	-0.128083	-0.220821	-0.0632504	0.107179	-0.369411	-0.0515398	-0.146813	-0.212632	-0.154925	-0.379041	0.148322	-0.00125755	0.0103553	0.061714	0.16043	-0.032622	-0.0186368	0.0314029	0.0380018	0.0772802	-0.206448	0.0587854	0.066071	-0.0599729	0.107835	0.304732	0.0879187	0.0685395	-0.148232	0.0580972	0.0266346
BT474-LR_2	human cell line	-0.0368329	0.000600463	0.108371	0.189065	-0.117564	-0.13981	-0.248143	-0.301439	-0.0670591	-0.141796	0.27225	0.348232	0.178279	0.282182	-0.209853	0.18876	0.00674214	-0.238312	-0.358687	-0.0257536	0.112164	-0.395899	0.0563087	-0.0840967	-0.204971	-0.0916955	-0.305421	-0.000108122	0.0141661	-0.0540066	0.0198694	0.202585	-0.0742201	-0.0393461	-0.00893653	0.0448835	0.0390743	-0.15898	-0.0623751	0.0879611	-0.117564	0.117173	0.17813	0.0310826	0.109334	-0.0659189	0.110397	0.149987
BT474-LR_3	human cell line	-0.000263192	0.00760498	0.149383	0.258802	0.0787085	-0.0297818	-0.17403	-0.155353	-0.0118983	-0.116856	0.274261	0.376406	0.0833631	0.317422	-0.164004	0.0623319	-0.0328399	-0.193366	0.104449	-0.0804712	0.102153	-0.394202	-0.0753671	-0.135876	-0.281227	-0.114403	-0.392055	0.0933561	-0.0107198	0.0360623	0.0585139	0.141913	-0.0333129	0.0117094	0.0280773	0.00451896	-0.0318632	-0.247055	0.0163497	0.082774	-0.0767951	0.0252755	0.324448	0.121881	0.0312024	-0.0638898	0.104517	0.0301854
BT474-TNPC30_1	human cell line	0.0277748	0.0767779	-0.0338363	0.0261905	-0.0965583	-0.0814983	0.12825	0.424906	-0.0586055	-0.0494508	-0.331386	-0.111791	0.113638	0.0804954	-0.0282369	-0.0518725	0.0858114	0.0261905	-0.00880932	0.0810882	0.101376	0.0655741	-0.00459148	-0.0122627	-0.00784485	0.0469881	0.0261905	-0.154163	0.00040677	-0.044485	-0.0958162	0.0513264	0.01109	0.0048492	-0.00760589	-0.0129227	-0.15127	-0.0174623	0.0450708	-0.0865434	-0.0257942	0.0913161	-0.0170473	-0.0652615	0.0128257	-0.020146	0.0261905	0.0431168
BT474-TNPC30_2	human cell line	-0.023759	0.0107628	0.0284766	0.0409701	-0.00753281	-0.0801457	0.0618739	0.40701	-0.0958799	-0.0227581	-0.273443	-0.0764031	0.105371	0.154535	-0.0532305	-0.0651603	0.0316809	0.0361154	0.210998	0.072735	0.121617	0.124632	0.0325471	-0.022085	-0.00775325	-0.0163068	0.0570369	-0.0651603	-6.88107e-05	-0.0372668	-0.0425232	0.043645	-0.0252448	-0.0244145	-0.0452503	-0.027824	-0.0848435	-0.0651603	0.0568675	-0.0528271	-0.0428868	0.14218	0.0861298	-0.0195728	0.110443	-0.00838269	0.0216511	0.0684828
BT474-TNPC30_3	human cell line	0.0430362	0.0529023	-0.00573915	-0.0525687	-0.0430196	-0.00677933	0.0940501	0.498122	-0.0576626	-0.00677933	-0.21878	-0.0383781	-0.0739479	0.170464	-0.00677933	-0.206131	0.0325569	-0.0436621	0.223897	0.0618796	0.167369	0.115604	0.0124588	0.0103758	0.0216166	-0.00179558	0.0886869	-0.0835089	0.0276692	0.0145928	-0.00677933	0.0346774	-0.00677933	0.0239684	-0.00677933	-0.00677933	-0.115147	-0.0533264	-0.00677933	-0.0270995	-0.0858013	0.0619208	-0.0136022	-0.0053002	-0.00677933	0.0017769	-0.169548	-0.0325724
BT474-TNPH30_1	human cell line	-0.0108804	-0.0182302	-0.114855	-0.081955	-0.20169	-0.0377683	0.0624263	0.318263	-0.0825893	-0.105842	-0.436418	-0.247215	0.177459	0.0230726	0.129297	0.21361	0.0725204	0.00692407	-0.382884	0.0726643	-0.0825208	-0.0986999	0.0864566	-0.0180907	0.055698	-0.0108393	0.150639	-0.152577	0.0152419	-0.0108393	0.0313608	0.0335164	-0.0773697	0.0471964	-0.214371	-0.00587707	-0.0108393	-0.0327016	0.0506214	-0.051877	0.0337039	0.168698	-0.362008	-0.0985825	0.11289	-0.0420689	0.0324586	0.129428
BT474-TNPH30_2	human cell line	0.0143796	0.000992109	-0.0978875	-0.0827758	-0.101533	0.0876922	0.0894007	0.34505	-0.0427207	-0.102642	-0.444225	-0.207919	0.0717694	0.0575152	0.141157	-0.0268569	0.089895	-0.000562536	-0.00770757	0.0598656	-0.155805	-0.045923	0.0139711	-0.0474401	0.0177887	0.0496984	0.14469	-0.146901	-0.0305905	0.102002	0.105888	0.0443156	-0.0460771	0.0284604	0.0586952	-0.0523775	-0.0545837	-0.337637	-0.0231399	-0.0586809	0.0472577	0.101543	-0.220337	-0.0799702	-0.00629973	-0.0694613	0.0118981	0.0506907
BT474-TNPH30_3	human cell line	-0.0181114	2.19489e-06	-0.183845	-0.228143	-0.0902225	0.126924	0.0595474	0.406794	-0.0229647	-0.0645099	-0.378034	-0.184921	-0.168041	0.105931	0.131673	-0.10584	0.0553976	-0.0622616	-0.0988664	0.0544972	-0.0888873	-0.0454218	-0.00346984	-0.00262784	0.110358	0.0834059	0.171049	-0.104662	0.0171467	0.119218	0.161449	-0.0762456	-0.0622812	0.0505684	0.0326901	-0.0530702	0.0117201	0.021983	-0.071591	-0.0774714	-0.0385984	-0.00762703	-0.358219	-0.00419119	-0.0190505	-0.0603655	-0.19387	-0.0283357
[truncated: 252 more columns]

## Sheet: NormLog2_MedianCentered
	Antibody Name	14-3-3-beta	14-3-3-zeta	4E-BP1	4E-BP1_pS65	53BP1	A-Raf	ACC1	ACC_pS79	ADAR1	Akt	Akt_pS473	Akt_pT308	AMPK-a2_pS345	AMPKa	AMPKa_pT172	Annexin-I	Annexin-VII	AR	ARID1A	Atg3	Atg7	ATM	ATM_pS1981	ATR_pS428	Aurora-B	Axl	b-Actin	b-Catenin	b-Catenin_pT41_S45	B-Raf	B-Raf_pS445	B7-H4	Bad_pS112	Bak	BAP1	Bax	Bcl-xL	Bcl2	Beclin	Bid	Bim	BiP-GRP78	BRD4	c-Abl	c-IAP2	c-Jun_pS73	c-Kit	c-Met_pY1234_Y1235
	Antibody Origin	R	R	R	R	R	R	R	R	M	R	R	R	R	R	R	M	M	R	R	R	R	R	R	R	R	R	R	R	R	R	R	R	R	R	M	R	R	M	G	R	R	M	R	R	R	R	R	R
	Gene Name	YWHAB	YWHAZ	EIF4EBP1	EIF4EBP1	TP53BP1	ARAF	ACACA	ACACA	ADAR	AKT1	AKT1	AKT1	PRKAA2	PRKAA1	PRKAA1	ANXA1	ANXA7	AR	ARID1A	ATG3	ATG7	ATM	ATM	ATR	AIM1	AXL	ACTB	CTNNB1	CTNNB1	BRAF	BRAF	VTCN1	BAD	BAK1	BAP1	BAX	BCL2L1	BCL2	BECN1	BID	BCL2L11	HSPA5	BRD4	ABL1	BIRC3	JUN	KIT	MET
	Validation Status	V	V	V	V	V	V	C	V	V	V	V	V	V	C	C	V	V	V	C	V	V	V	V	C	V	V	C	V	V	C	V	C	V	C	V	V	V	V	C	C	V	C	V	V	C	V	V	V
	Slide Id	GBL1104023	GBL1104024	GBL1103783	GBL1103784	GBL1103871	GBL1103933	GBL1103786	GBL1103785	GBL1104049	GBL1103778	GBL1103775	GBL1104121	GBL1103953	GBL1103787	GBL1103788	GBL1104052	GBL1104048	GBL1104098	GBL1103966	GBL1103973	GBL1103974	GBL1103955	GBL1103956	GBL1103997	GBL1103963	GBL1103945	GBL1103916	GBL1103792	GBL1103917	GBL1104125	GBL1103796	GBL1103992	GBL1103789	GBL1103790	GBL1104074	GBL1103791	GBL1103793	GBL1104131	GBL1104087	GBL1103794	GBL1103795	GBL1104126	GBL1103969	GBL1103968	GBL1103975	GBL1103802	GBL1103803	GBL1104093
	Antibody Name in Heatmap	14-3-3-beta-R-V	14-3-3-zeta-R-V	4E-BP1-R-V	4E-BP1_pS65-R-V	53BP1-R-V	A-Raf-R-V	ACC1-R-C	ACC_pS79-R-V	ADAR1-M-V	Akt-R-V	Akt_pS473-R-V	Akt_pT308-R-V	AMPK-a2_pS345-R-V	AMPKa-R-C	AMPKa_pT172-R-C	Annexin-I-M-V	Annexin-VII-M-V	AR-R-V	ARID1A-R-C	Atg3-R-V	Atg7-R-V	ATM-R-V	ATM_pS1981-R-V	ATR_pS428-R-C	Aurora-B-R-V	Axl-R-V	b-Actin-R-C	b-Catenin-R-V	b-Catenin_pT41_S45-R-V	B-Raf-R-C	B-Raf_pS445-R-V	B7-H4-R-C	Bad_pS112-R-V	Bak-R-C	BAP1-M-V	Bax-R-V	Bcl-xL-R-V	Bcl2-M-V	Beclin-G-C	Bid-R-C	Bim-R-V	BiP-GRP78-M-C	BRD4-R-V	c-Abl-R-V	c-IAP2-R-C	c-Jun_pS73-R-V	c-Kit-R-V	c-Met_pY1234_Y1235-R-V
	Probabilities (QC Score)	0.95038	0.960315	0.963321	0.967658	0.974449	0.95962	0.96617	0.953881	0.953315	0.945115	0.96718	0.941804	0.923499	0.964362	0.974401	0.930091	0.839121	0.929832	0.952876	0.893691	0.969682	0.963859	0.890778	0.945009	0.943998	0.964858	0.822914	0.950618	0.9068	0.929841	0.952239	0.911671	0.960604	0.95764	0.917675	0.950547	0.967553	0.855205	0.918156	0.939759	0.96108	0.870323	0.936145	0.963543	0.933187	0.94487	0.962975	0.918246
	Slide no.	1	2	3	4	5	6	7	8	9	10	11	12	13	14	15	16	17	18	19	20	21	22	23	24	25	26	27	28	29	30	31	32	33	34	35	36	37	38	39	40	41	42	43	44	45	46	47	48
Sample description	Sample Type	14-3-3-beta-R-V	14-3-3-zeta-R-V	4E-BP1-R-V	4E-BP1_pS65-R-V	53BP1-R-V	A-Raf-R-V	ACC1-R-C	ACC_pS79-R-V	ADAR1-M-V	Akt-R-V	Akt_pS473-R-V	Akt_pT308-R-V	AMPK-a2_pS345-R-V	AMPKa-R-C	AMPKa_pT172-R-C	Annexin-I-M-V	Annexin-VII-M-V	AR-R-V	ARID1A-R-C	Atg3-R-V	Atg7-R-V	ATM-R-V	ATM_pS1981-R-V	ATR_pS428-R-C	Aurora-B-R-V	Axl-R-V	b-Actin-R-C	b-Catenin-R-V	b-Catenin_pT41_S45-R-V	B-Raf-R-C	B-Raf_pS445-R-V	B7-H4-R-C	Bad_pS112-R-V	Bak-R-C	BAP1-M-V	Bax-R-V	Bcl-xL-R-V	Bcl2-M-V	Beclin-G-C	Bid-R-C	Bim-R-V	BiP-GRP78-M-C	BRD4-R-V	c-Abl-R-V	c-IAP2-R-C	c-Jun_pS73-R-V	c-Kit-R-V	c-Met_pY1234_Y1235-R-V
		Median-Centered	Median-Centered	Median-Centered	Median-Centered	Median-Centered	Median-Centered	Median-Centered	Median-Centered	Median-Centered	Median-Centered	Median-Centered	Median-Centered	Median-Centered	Median-Centered	Median-Centered	Median-Centered	Median-Centered	Median-Centered	Median-Centered	Median-Centered	Median-Centered	Median-Centered	Median-Centered	Median-Centered	Median-Centered	Median-Centered	Median-Centered	Median-Centered	Median-Centered	Median-Centered	Median-Centered	Median-Centered	Median-Centered	Median-Centered	Median-Centered	Median-Centered	Median-Centered	Median-Centered	Median-Centered	Median-Centered	Median-Centered	Median-Centered	Median-Centered	Median-Centered	Median-Centered	Median-Centered	Median-Centered	Median-Centered
BT474_1	human cell line	-0.0194675	0.0234639	-0.0762388	0.105926	0.0659986	0	0.0771934	-0.232128	0.0499457	0.265525	0.264944	0.141082	0.0349107	-0.12648	0.0803261	0.507285	-0.0226849	0.305278	0.102092	0	-0.0141079	0	0	0.0184474	-0.0081895	-0.0204219	-0.102241	0.20278	-0.0146852	-0.0623534	-0.171169	-0.0494592	0.0372964	-0.0465216	0.0143044	-0.0132339	0.21384	0.0539424	0.0024589	0.037909	0.0956983	-0.0779879	-0.091912	0	0	0.0421773	0.0615597	0.0282788
BT474_2	human cell line	-0.00989736	-0.000600463	-0.0413077	0.113758	0.0912394	0.0797086	0.155936	-0.0604093	0.0238797	0.440404	0.572631	0.256828	-0.166155	-0.0736011	0.186948	0.383309	-0.156589	0.276778	0.371604	-0.0241461	0	0.0802147	-0.084065	0.0136648	0.0757293	0.002314	0.0205932	0.502552	-0.0387329	0.0148656	-0.00629297	-0.15018	0.0458864	-0.063796	0.0266506	-0.00557575	0.357324	0.284346	-0.0672412	0.0329715	-0.027701	-0.159908	0.116163	0.116104	-0.144016	0.00728258	-0.168795	-0.116312
BT474_3	human cell line	-0.0596482	-0.0202521	0.0082662	0.119135	0.159315	0.0195676	0.116756	-0.0454098	0.0903801	0.222704	0.154738	0.116517	-0.209382	-0.0575152	0.279995	0.519392	-0.119014	0.25506	0.487389	-0.00597489	0.0171592	0.037869	-0.0604235	0.0122627	0.0298623	-0.0133021	0.0740931	0.223242	0.00609403	-0.000649856	-0.11536	-0.197034	0.0419449	-0.0157366	-0.00458428	0.00711135	0.123491	0.294377	-0.0494511	0.0830759	0.059396	-0.0887699	0.160426	0.081974	-0.049148	0.0911935	-0.168431	-0.106465
BT474-TR_1	human cell line	0.0427535	-0.132501	-0.0101994	-0.143927	-0.0103339	0.0527965	-0.376527	0	0.0118421	0.107794	0	-0.0385098	-0.0401367	-0.0978644	-0.277757	-0.0648528	-0.0368213	-0.0316646	-0.107047	0.0188183	-0.120213	-0.0284826	0.0167872	0.0297809	-0.00448877	0.128639	-0.0885604	-0.00927368	-0.00148069	-0.0631427	-0.0954283	-0.0430685	-0.117968	0.0214007	-0.00543218	0.0595161	0.0591924	0.200146	-0.0197618	0	0.0808873	0	0	-0.0616289	0.00254982	0.100416	0.00501035	-0.0384995
BT474-TR_2	human cell line	0.0221299	-0.103201	0.0317962	-0.200568	0.0430525	0.0745344	-0.330428	0.0988233	0.033765	0.219494	0.0462113	0	-0.220929	-0.085488	-0.244534	-0.143315	-0.0439542	-0.067413	0.0254854	-0.00676115	-0.126175	0.0652761	0.0240252	0.00387095	0.0780392	0.0558225	0	0.118131	-0.0369339	0.00147614	0.0523465	-0.0753029	-0.13035	0.0137726	0.0272807	0.0300617	0.137029	0.9526	-0.0534348	0.0333375	0.0412679	-0.0538465	-0.282711	-0.0245988	-0.0775347	0.0302494	-0.226789	-0.134334
BT474-TR_3	human cell line	0.0515508	-0.13033	0.052144	-0.0358776	0	0.0698443	-0.327554	-0.0133012	0.078963	0.0279417	-0.013649	0.0840439	-0.0253645	-0.120336	-0.244729	0	-0.0749977	0.0659208	0	-0.0126961	-0.148044	0.00232175	-0.0187844	-0.00549337	-0.0414779	-0.196164	-0.130335	-0.0520871	-0.0244179	0	-0.0605941	-0.176931	-0.129932	0.0346954	0	-0.0145245	0.0033497	0.417694	0.00714527	-0.0136059	0.144342	-0.0842205	0.0786249	-0.00267204	0.0247285	0.021271	0.0512622	0.0162194
BT474-LR_1	human cell line	0.0371876	0.0193938	0.13939	0.209803	0.0649991	-0.100383	-0.282694	-0.0795167	0.0349536	-0.00104027	0.304698	0.434578	0.041515	0.263868	-0.0816363	0.0410346	0.0459096	-0.12752	-0.235493	-0.0473076	0.109014	-0.413494	-0.0493812	-0.134551	-0.204879	-0.144086	-0.426374	0.213482	0	0.0169512	0.0684933	0.126914	0.000690893	-0.0303462	0.0367222	0.0447812	0.0382059	-0.188986	0.0655647	0.0775418	-0.0341788	0.0663505	0.228763	0.103861	0.040644	-0.139849	0.0319068	-0.00355089
BT474-LR_2	human cell line	-0.0365697	0	0.11411	0.162875	-0.106619	-0.149631	-0.310017	-0.213941	-0.0551608	-0.119038	0.212196	0.326365	0.10651	0.224667	-0.181616	0.169882	0	-0.237749	-0.373359	-0.0098108	0.113999	-0.439982	0.0584672	-0.071834	-0.197217	-0.0808561	-0.352753	0.0650522	0.0154236	-0.0474107	0.0266487	0.169069	-0.0409073	-0.0510555	-0.00361723	0.0516628	0	-0.141517	-0.0555958	0.099432	-0.0917702	0.0756884	0.102161	0.0470254	0.0814381	-0.0575362	0.0842065	0.119801
BT474-LR_3	human cell line	0	0.00700452	0.155122	0.232611	0.089654	-0.0396025	-0.235904	-0.0678553	0	-0.0940983	0.214207	0.354539	0.0115938	0.259906	-0.135767	0.0434536	-0.039582	-0.192804	0.089777	-0.0645284	0.103988	-0.438285	-0.0732085	-0.123614	-0.273474	-0.103564	-0.439388	0.158516	-0.00946226	0.0426582	0.0652933	0.108396	0	0	0.0333966	0.0112983	-0.0709375	-0.229593	0.023129	0.0942449	-0.051001	-0.0162087	0.248479	0.137823	0.00330688	-0.0555071	0.0783262	0
BT474-TNPC30_1	human cell line	0.028038	0.0761775	-0.0280971	0	-0.0856127	-0.091319	0.0663764	0.512404	-0.0467071	-0.0266928	-0.39144	-0.133657	0.0418689	0.0229802	0	-0.0707509	0.0790693	0.026753	-0.0234816	0.097031	0.10321	0.021491	-0.00243295	0	-9.15972e-05	0.0578274	-0.0211419	-0.0890028	0.00166432	-0.0378892	-0.0890369	0.01781	0.0444029	-0.00686025	-0.00228659	-0.00614339	-0.190344	0	0.0518501	-0.0750726	0	0.0498319	-0.0930166	-0.0493187	-0.0150698	-0.0117633	0	0.0129313
BT474-TNPC30_2	human cell line	-0.0234958	0.0101623	0.0342158	0.0147797	0.00341274	-0.0899664	0	0.494508	-0.0839816	0	-0.333497	-0.0982697	0.0336014	0.0970197	-0.0249936	-0.0840387	0.0249388	0.036678	0.196325	0.0886778	0.123452	0.0805488	0.0347057	-0.00982231	0	-0.00546744	0.0097045	0	0.00118874	-0.0306709	-0.0357439	0.0101285	0.00806802	-0.0361239	-0.039931	-0.0210447	-0.123918	-0.047698	0.0636468	-0.0413563	-0.0170927	0.100695	0.0101605	-0.00363002	0.0825473	0	-0.00453942	0.0382974
BT474-TNPC30_3	human cell line	0.0432994	0.0523018	0	-0.0787592	-0.032074	-0.0166	0.0321762	0.58562	-0.0457643	0.0159787	-0.278834	-0.0602448	-0.145717	0.112949	0.0214576	-0.22501	0.0258148	-0.0430996	0.209224	0.0778223	0.169203	0.0715205	0.0146174	0.0226385	0.0293699	0.00904376	0.0413545	-0.0183486	0.0289267	0.0211887	0	0.00116097	0.0265335	0.0122589	-0.00146003	0	-0.154222	-0.0358641	0	-0.0156287	-0.0600071	0.0204366	-0.0895715	0.0106425	-0.0346748	0.0101596	-0.195739	-0.0627579
BT474-TNPH30_1	human cell line	-0.0106172	-0.0188307	-0.109116	-0.108145	-0.190744	-0.047589	0.000552448	0.405761	-0.070691	-0.0830835	-0.496472	-0.269082	0.10569	-0.0344426	0.157534	0.194732	0.0657782	0.00748661	-0.397557	0.088607	-0.080686	-0.142783	0.0886151	-0.00582805	0.0634513	0	0.103307	-0.0874169	0.0164995	-0.00424349	0.0381401	0	-0.0440569	0.0354869	-0.209052	0.000902254	-0.0499136	-0.0152393	0.0574007	-0.0404062	0.0594981	0.127214	-0.437977	-0.0826398	0.0849942	-0.0336862	0.00626815	0.0992426
BT474-TNPH30_2	human cell line	0.0146428	0.000391646	-0.0921483	-0.108966	-0.0905873	0.0778714	0.0275269	0.432548	-0.0308224	-0.0798836	-0.504278	-0.229786	0	0	0.169394	-0.0457352	0.0831529	0	-0.0223799	0.0758083	-0.15397	-0.0900061	0.0161296	-0.0351775	0.025542	0.0605377	0.0973577	-0.081741	-0.0293329	0.108598	0.112667	0.0107991	-0.0127643	0.016751	0.0640145	-0.0455982	-0.093658	-0.320175	-0.0163606	-0.04721	0.0730518	0.060059	-0.296306	-0.0640274	-0.0341952	-0.0610786	-0.0142924	0.0205053
BT474-TNPH30_3	human cell line	-0.0178483	-0.000598268	-0.178106	-0.254334	-0.079277	0.117103	-0.00232646	0.494292	-0.0110664	-0.0417518	-0.438087	-0.206788	-0.239811	0.0484163	0.159909	-0.124719	0.0486554	-0.0616991	-0.113539	0.07044	-0.0870525	-0.0895049	-0.0013113	0.00963483	0.118111	0.0942453	0.123717	-0.0395019	0.0184042	0.125814	0.168228	-0.109762	-0.0289684	0.0388589	0.0380094	-0.0462909	-0.0273542	0.0394453	-0.0648117	-0.0660006	-0.0128043	-0.0491112	-0.434188	0.0117516	-0.046946	-0.0519828	-0.22006	-0.0585212
[truncated: 252 more columns]
